# Supplementary material for: Early Life Exercise Training and Inhibition of Apolipoprotein B Expression to Improve Age-Related Arrhythmias and Prolong the Average Lifespan in Drosophila
Source: Preprints.org preprint supplement (doi:10.20944/preprints202203.0380.v1), 2022-03-29
Supplement: Supplementary file 1 [file M-mode_data.xls]

## Sheet: Sheet1
Heart Rate	Heart Period	Arrhythmia Index	Group		Notice
2.85782	0.35016	0.027098	LSP_A_2W		LSP_A_2W=LSP2-Gal4+2 Week
2.16574	0.463218	0.055741	LSP_A_2W		LSP_A_5W=LSP2-Gal4+5 Week
2.30933	0.433378	0.028489	LSP_A_2W		LSP_E_2W=LSP2-Gal4+Exercise+2 Week
2.76582	0.361831	0.027983	LSP_A_2W		LSP_E_5W=LSP2-Gal4+Exercise+5 Week
2.61707	0.382409	0.028465	LSP_A_2W		LSP×33388_A_2W=LSP2-Gal4>apoLppRNAi+2 Week
1.56858	0.666666	0.177676	LSP_A_2W		LSP×33388_A_5W=LSP2-Gal4>apoLppRNAi+5 Week
2.80319	0.357276	0.038067	LSP_A_2W		LSP×33388_E_2W=LSP2-Gal4>apoLppRNAi+Exercise+2 Week
1.57367	0.635753	0.021981	LSP_A_2W		LSP×33388_E_5W=LSP2-Gal4>apoLppRNAi+Exercise+5 Week
1.70271	0.587458	0.017009	LSP_A_2W		LSP×W1118_A_2W=LSP2-Gal4>W1118+2 Week
2.05659	0.545424	0.0538321	LSP_A_2W		LSP×W1118_A_5W=LSP2-Gal4>W1118+5 Week
1.84605	0.542457	0.0372861	LSP_A_2W		LSP×W1118_E_2W=LSP2-Gal4>W1118+Exercise+2 Week
2.16742	0.462083	0.039726	LSP_A_2W		LSP×W1118_E_5W=LSP2-Gal4>W1118+Exercise+5 Week
1.90431	0.525659	0.033575	LSP_A_2W		W1118_A_2W=W1118+2 Week
1.85473	0.548003	0.115511	LSP_A_2W		W1118_A_5W=W1118+5 Week
1.83513	0.547065	0.059483	LSP_A_2W		W1118_E_2W=W1118+Exercise+2 Week
2.61007	0.417785	0.350058	LSP_A_2W		W1118_E_5W=W1118+Exercise+5 Week
2.03016	0.496089	0.077952	LSP_A_2W
1.68377	0.594522	0.031924	LSP_A_2W
2.63934	0.381204	0.0768	LSP_A_2W
1.88263	0.531391	0.0211378	LSP_A_2W
2.17376	0.46397	0.100137	LSP_A_2W
1.80795	0.555416	0.0659112	LSP_A_2W
2.11288	0.474406	0.0482169	LSP_A_2W
1.74152	0.583784	0.140468	LSP_A_2W
1.95204	0.521368	0.1259	LSP_A_2W
1.7763	0.563477	0.0305535	LSP_A_2W
1.74222	0.574527	0.0309969	LSP_A_2W
3.6659	0.272864	0.01713	LSP_A_2W
2.67341	0.374757	0.042889	LSP_A_2W
2.84016	0.352738	0.044006	LSP_A_2W
1.60544	0.631617	0.125823	LSP_A_5W
1.71543	0.669031	0.406615	LSP_A_5W
1.24381	0.849546	0.215788	LSP_A_5W
1.65925	0.729723	0.64217	LSP_A_5W
1.16339	1.04813	0.445348	LSP_A_5W
1.62588	0.668308	0.284337	LSP_A_5W
1.23901	0.819768	0.106821	LSP_A_5W
0.987329	1.01648	0.061439	LSP_A_5W
1.41014	0.720101	0.111152	LSP_A_5W
1.75647	0.589709	0.17455	LSP_A_5W
1.91236	0.534648	0.140738	LSP_A_5W
0.97554	1.04333	0.16147	LSP_A_5W
2.11173	0.504638	0.247916	LSP_A_5W
1.3062	1.49824	0.527316	LSP_A_5W
1.79812	0.636286	0.52747	LSP_A_5W
1.96907	0.51968	0.146777	LSP_A_5W
1.59641	0.665581	0.187321	LSP_A_5W
2.0137	0.519394	0.182954	LSP_A_5W
1.31376	0.786941	0.177066	LSP_A_5W
1.35747	0.837762	0.454813	LSP_A_5W
2.1703	0.477067	0.177834	LSP_A_5W
1.12309	1.00846	0.491491	LSP_A_5W
0.830247	1.31075	0.448041	LSP_A_5W
1.45697	0.699163	0.134954	LSP_A_5W
1.06703	1.00724	0.241928	LSP_A_5W
1.74792	0.578173	0.107059	LSP_A_5W
1.71671	0.592599	0.124709	LSP_A_5W
1.13732	0.889131	0.103162	LSP_A_5W
1.93162	0.555627	0.393981	LSP_A_5W
1.82642	0.614225	0.37036	LSP_A_5W
1.95194	0.512794	0.030765	LSP_E_2W
1.94953	0.513637	0.03708	LSP_E_2W
2.1114	0.476611	0.07728	LSP_E_2W
4.51382	0.22339	0.083161	LSP_E_2W
1.63621	0.611612	0.026705	LSP_E_2W
1.67314	0.600592	0.06477	LSP_E_2W
1.62235	0.61779	0.047683	LSP_E_2W
1.20716	0.829394	0.034706	LSP_E_2W
2.43735	0.410749	0.035079	LSP_E_2W
1.3279	0.759068	0.079558	LSP_E_2W
2.20772	0.457202	0.081707	LSP_E_2W
2.48812	0.406073	0.109382	LSP_E_2W
2.01626	0.497585	0.055993	LSP_E_2W
2.87779	0.347739	0.028168	LSP_E_2W
2.19826	0.455205	0.026214	LSP_E_2W
3.63809	0.275317	0.042921	LSP_E_2W
1.1281	0.888145	0.043882	LSP_E_2W
3.26366	0.316918	0.232	LSP_E_2W
3.16234	0.327543	0.281552	LSP_E_2W
2.48146	0.403141	0.020667	LSP_E_2W
1.60985	0.622064	0.03887	LSP_E_2W
1.89393	0.52853	0.03009	LSP_E_2W
1.29668	0.771927	0.031158	LSP_E_2W
1.37988	0.726588	0.052312	LSP_E_2W
1.38303	0.726198	0.065707	LSP_E_2W
1.44436	0.697077	0.079816	LSP_E_2W
1.92819	0.518839	0.020866	LSP_E_2W
1.98778	0.5034	0.025939	LSP_E_2W
1.66813	0.602263	0.067246	LSP_E_2W
0.928045	1.07899	0.036724	LSP_E_2W
1.27143	0.786945	0.023402	LSP_E_5W
1.29008	0.775681	0.026038	LSP_E_5W
1.28789	0.78413	0.102071	LSP_E_5W
1.32651	0.758011	0.072725	LSP_E_5W
1.2289	0.814371	0.028	LSP_E_5W
1.37089	0.747206	0.13333	LSP_E_5W
1.1292	0.886942	0.038633	LSP_E_5W
0.943766	1.06951	0.099149	LSP_E_5W
1.58503	0.631236	0.023212	LSP_E_5W
1.47383	0.679003	0.027448	LSP_E_5W
1.10623	0.906399	0.052012	LSP_E_5W
1.59893	0.633152	0.10863	LSP_E_5W
1.5617	0.641344	0.040017	LSP_E_5W
1.89325	0.528676	0.029893	LSP_E_5W
1.78716	0.559659	0.014287	LSP_E_5W
1.77156	0.564719	0.021865	LSP_E_5W
1.92454	0.519963	0.02602	LSP_E_5W
1.52644	0.65577	0.031376	LSP_E_5W
1.3314	0.751726	0.030931	LSP_E_5W
1.30091	0.769822	0.038368	LSP_E_5W
1.50452	0.66521	0.02849	LSP_E_5W
1.61222	0.62113	0.034918	LSP_E_5W
1.55259	0.646044	0.053875	LSP_E_5W
1.92836	0.518838	0.022586	LSP_E_5W
1.41979	0.7047	0.02284	LSP_E_5W
1.73593	0.576264	0.01875	LSP_E_5W
1.25551	0.800782	0.071057	LSP_E_5W
2.08894	0.479196	0.032033	LSP_E_5W
1.50167	0.689434	0.191286	LSP_E_5W
1.31803	0.771718	0.126342	LSP_E_5W
2.03762	0.491291	0.031694	LSP×33388_A_2W
2.53982	0.402925	0.174033	LSP×33388_A_2W
1.67613	0.596838	0.020507	LSP×33388_A_2W
1.7248	0.580032	0.021732	LSP×33388_A_2W
1.8484	0.54113	0.016485	LSP×33388_A_2W
1.89825	0.526957	0.017607	LSP×33388_A_2W
1.83941	0.543801	0.016746	LSP×33388_A_2W
1.97337	0.506851	0.014731	LSP×33388_A_2W
2.04992	0.488228	0.026795	LSP×33388_A_2W
2.13681	0.468277	0.025957	LSP×33388_A_2W
1.722	0.581283	0.031048	LSP×33388_A_2W
1.8401	0.544386	0.041499	LSP×33388_A_2W
1.72306	0.582547	0.064769	LSP×33388_A_2W
1.37196	0.73353	0.083815	LSP×33388_A_2W
1.52828	0.656458	0.059016	LSP×33388_A_2W
2.07689	0.48166	0.01885	LSP×33388_A_2W
1.82781	0.5478	0.034077	LSP×33388_A_2W
2.28936	0.437619	0.041543	LSP×33388_A_2W
3.58055	0.280966	0.09693	LSP×33388_A_2W
2.31761	0.431602	0.017089	LSP×33388_A_2W
1.72111	0.585055	0.080541	LSP×33388_A_2W
1.87696	0.570599	0.069041	LSP×33388_A_2W
3.51716	0.28876	0.156859	LSP×33388_A_2W
2.08869	0.478809	0.009952	LSP×33388_A_2W
2.05659	0.545424	0.053832	LSP×33388_A_2W
1.78171	0.56147	0.019325	LSP×33388_A_2W
2.05438	0.499212	0.148231	LSP×33388_A_2W
1.92978	0.525524	0.101506	LSP×33388_A_2W
2.03301	0.498401	0.101241	LSP×33388_A_2W
2.04234	0.50057	0.143001	LSP×33388_A_2W
1.62827	0.646741	0.219101	LSP×33388_A_5W
1.42605	0.701948	0.032798	LSP×33388_A_5W
1.86263	0.537114	0.021013	LSP×33388_A_5W
1.86727	0.535781	0.021309	LSP×33388_A_5W
1.92404	0.520096	0.026095	LSP×33388_A_5W
1.91956	0.521513	0.032612	LSP×33388_A_5W
1.68366	0.594544	0.031891	LSP×33388_A_5W
1.65361	0.605175	0.027494	LSP×33388_A_5W
2.06476	0.503284	0.203936	LSP×33388_A_5W
1.3993	0.720709	0.085674	LSP×33388_A_5W
1.35141	0.742061	0.052786	LSP×33388_A_5W
1.73209	0.577674	0.024137	LSP×33388_A_5W
1.22942	0.813698	0.019942	LSP×33388_A_5W
1.24239	0.805238	0.021017	LSP×33388_A_5W
1.4024	0.717594	0.06664	LSP×33388_A_5W
1.65664	0.612779	0.109846	LSP×33388_A_5W
1.47092	0.684405	0.081218	LSP×33388_A_5W
1.44503	0.695739	0.070564	LSP×33388_A_5W
1.76062	0.568398	0.02705	LSP×33388_A_5W
1.09432	0.914413	0.025808	LSP×33388_A_5W
1.06273	0.959596	0.157553	LSP×33388_A_5W
1.1265	0.890597	0.054875	LSP×33388_A_5W
1.95796	0.511246	0.034954	LSP×33388_A_5W
1.56659	0.638545	0.018707	LSP×33388_A_5W
1.01291	0.987716	0.022309	LSP×33388_A_5W
1.19412	0.845525	0.092016	LSP×33388_A_5W
1.46299	0.686642	0.064423	LSP×33388_A_5W
1.4447	0.704132	0.15321	LSP×33388_A_5W
1.2913	0.775246	0.032686	LSP×33388_A_5W
1.22445	0.817036	0.020537	LSP×33388_A_5W
2.02216	0.495165	0.035285	LSP×33388_E_2W
1.97751	0.505745	0.01103	LSP×33388_E_2W
1.46623	0.693831	0.128618	LSP×33388_E_2W
1.8401	0.544386	0.041499	LSP×33388_E_2W
1.76093	0.569976	0.059494	LSP×33388_E_2W
2.17377	0.461962	0.067086	LSP×33388_E_2W
1.47751	0.695167	0.151416	LSP×33388_E_2W
1.62148	0.616773	0.009182	LSP×33388_E_2W
1.60424	0.623936	0.030448	LSP×33388_E_2W
2.1021	0.475957	0.02357	LSP×33388_E_2W
2.05782	0.486475	0.033047	LSP×33388_E_2W
1.69054	0.593405	0.055045	LSP×33388_E_2W
2.05302	0.487306	0.021399	LSP×33388_E_2W
1.36371	0.734052	0.031809	LSP×33388_E_2W
1.46557	0.688693	0.096481	LSP×33388_E_2W
1.67666	0.596833	0.02723	LSP×33388_E_2W
1.65419	0.605928	0.048007	LSP×33388_E_2W
1.66247	0.603046	0.044436	LSP×33388_E_2W
1.66594	0.600405	0.015389	LSP×33388_E_2W
2.23093	0.449412	0.052042	LSP×33388_E_2W
2.11288	0.474406	0.0482169	LSP×33388_E_2W
1.59686	0.62666	0.026382	LSP×33388_E_2W
1.50248	0.665924	0.023404	LSP×33388_E_2W
1.46606	0.690558	0.091555	LSP×33388_E_2W
1.63435	0.613948	0.057681	LSP×33388_E_2W
1.36081	0.742271	0.097534	LSP×33388_E_2W
1.41102	0.708996	0.021069	LSP×33388_E_2W
1.45861	0.685897	0.022756	LSP×33388_E_2W
2.07739	0.481655	0.024339	LSP×33388_E_2W
1.9438	0.514753	0.024399	LSP×33388_E_2W
1.40622	0.712711	0.048452	LSP×33388_E_5W
2.01085	0.497991	0.036488	LSP×33388_E_5W
1.46769	0.682958	0.047361	LSP×33388_E_5W
1.80795	0.555416	0.065911	LSP×33388_E_5W
1.8873	0.535375	0.097272	LSP×33388_E_5W
1.71568	0.586028	0.070996	LSP×33388_E_5W
1.34239	0.747836	0.062461	LSP×33388_E_5W
1.28953	0.776139	0.029464	LSP×33388_E_5W
0.953123	1.07364	0.138839	LSP×33388_E_5W
0.996019	1.01183	0.087595	LSP×33388_E_5W
1.33494	0.749469	0.023221	LSP×33388_E_5W
1.67704	0.605104	0.11137	LSP×33388_E_5W
1.6973	0.592601	0.07149	LSP×33388_E_5W
1.7763	0.563477	0.030554	LSP×33388_E_5W
1.72856	0.579882	0.045919	LSP×33388_E_5W
1.77562	0.563643	0.028348	LSP×33388_E_5W
1.8437	0.542471	0.013104	LSP×33388_E_5W
1.46562	0.682549	0.018907	LSP×33388_E_5W
1.71291	0.587953	0.077817	LSP×33388_E_5W
1.48137	0.687905	0.127341	LSP×33388_E_5W
1.78832	0.561478	0.06475	LSP×33388_E_5W
1.54425	0.650947	0.067927	LSP×33388_E_5W
1.71621	0.58651	0.071377	LSP×33388_E_5W
1.15629	0.866067	0.037335	LSP×33388_E_5W
1.11034	0.901524	0.031678	LSP×33388_E_5W
1.88264	0.531391	0.021138	LSP×33388_E_5W
1.90431	0.525659	0.033575	LSP×33388_E_5W
1.46955	0.698399	0.139313	LSP×33388_E_5W
1.86054	0.54068	0.074531	LSP×33388_E_5W
1.67069	0.603089	0.078224	LSP×33388_E_5W
1.72851	0.579874	0.0484126	LSP×W1118_A_2W
1.86586	0.537407	0.0485633	LSP×W1118_A_2W
2.02633	0.494187	0.037316	LSP×W1118_A_2W
2.05659	0.545424	0.0538321	LSP×W1118_A_2W
2.15116	0.470051	0.097044	LSP×W1118_A_2W
1.81488	0.561933	0.120217	LSP×W1118_A_2W
1.86586	0.537407	0.048563	LSP×W1118_A_2W
2.08928	0.482031	0.0789795	LSP×W1118_A_2W
2.14831	0.468199	0.0753734	LSP×W1118_A_2W
2.12095	0.474666	0.0735041	LSP×W1118_A_2W
1.76745	0.569174	0.072505	LSP×W1118_A_2W
1.89235	0.531281	0.0708424	LSP×W1118_A_2W
1.88661	0.532456	0.066299	LSP×W1118_A_2W
1.75154	0.573585	0.0662942	LSP×W1118_A_2W
1.77444	0.565477	0.0588225	LSP×W1118_A_2W
1.59033	0.629906	0.040078	LSP×W1118_A_2W
2.10046	0.480867	0.0879841	LSP×W1118_A_2W
1.88417	0.540683	0.138688	LSP×W1118_A_2W
1.96505	0.51937	0.133772	LSP×W1118_A_2W
2.05782	0.486475	0.033047	LSP×W1118_A_2W
1.87944	0.536526	0.089003	LSP×W1118_A_2W
2.07494	0.484026	0.064997	LSP×W1118_A_2W
1.86613	0.540981	0.092115	LSP×W1118_A_2W
2.12957	0.47079	0.049167	LSP×W1118_A_2W
2.19021	0.459462	0.078719	LSP×W1118_A_2W
1.83811	0.544531	0.029884	LSP×W1118_A_2W
2.38702	0.420817	0.0683128	LSP×W1118_A_2W
2.28527	0.43805	0.033298	LSP×W1118_A_2W
2.60843	0.383442	0.013848	LSP×W1118_A_2W
2.08265	0.481661	0.055814	LSP×W1118_A_2W
1.12989	0.951149	0.247346	LSP×W1118_A_5W
1.22295	0.866788	0.232716	LSP×W1118_A_5W
1.39089	0.904877	0.258041	LSP×W1118_A_5W
1.11523	0.917414	0.144047	LSP×W1118_A_5W
1.38087	0.754806	0.269512	LSP×W1118_A_5W
1.0977	0.988463	0.183328	LSP×W1118_A_5W
0.974516	1.06505	0.215986	LSP×W1118_A_5W
1.56656	0.707038	0.281705	LSP×W1118_A_5W
1.47191	0.723912	0.236122	LSP×W1118_A_5W
1.59029	0.676388	0.273474	LSP×W1118_A_5W
1.41292	0.747205	0.208966	LSP×W1118_A_5W
1.3504	0.770452	0.217691	LSP×W1118_A_5W
1.56532	0.706842	0.281801	LSP×W1118_A_5W
1.47186	0.723912	0.234717	LSP×W1118_A_5W
1.58986	0.676388	0.272768	LSP×W1118_A_5W
1.41478	0.747205	0.214953	LSP×W1118_A_5W
1.41741	0.731929	0.167469	LSP×W1118_A_5W
1.46606	0.69688	0.133255	LSP×W1118_A_5W
1.13656	1.02069	0.409289	LSP×W1118_A_5W
2.43424	0.460843	0.776619	LSP×W1118_A_5W
1.62457	0.63144	0.173565	LSP×W1118_A_5W
1.30339	0.852508	0.261766	LSP×W1118_A_5W
1.66893	0.617294	0.205518	LSP×W1118_A_5W
1.26684	0.858493	0.257572	LSP×W1118_A_5W
1.07704	1.03244	0.372452	LSP×W1118_A_5W
1.625	0.63144	0.178824	LSP×W1118_A_5W
0.614723	1.66563	0.152046	LSP×W1118_A_5W
1.66922	0.617123	0.204471	LSP×W1118_A_5W
2.05827	0.546767	0.682851	LSP×W1118_A_5W
1.8719	0.570135	0.227513	LSP×W1118_A_5W
2.14144	0.467764	0.037914	LSP×W1118_E_2W
2.11778	0.473497	0.047405	LSP×W1118_E_2W
1.71503	0.592752	0.108857	LSP×W1118_E_2W
1.70901	0.58553	0.025951	LSP×W1118_E_2W
2.00367	0.509755	0.132048	LSP×W1118_E_2W
2.08938	0.478925	0.025651	LSP×W1118_E_2W
2.08041	0.481653	0.046598	LSP×W1118_E_2W
1.88025	0.532013	0.018839	LSP×W1118_E_2W
2.23949	0.450543	0.080037	LSP×W1118_E_2W
2.27336	0.439965	0.014218	LSP×W1118_E_2W
2.26173	0.442239	0.015371	LSP×W1118_E_2W
1.91188	0.523086	0.009861	LSP×W1118_E_2W
1.98213	0.504773	0.022545	LSP×W1118_E_2W
1.87454	0.536095	0.062486	LSP×W1118_E_2W
1.97209	0.509611	0.070051	LSP×W1118_E_2W
2.22299	0.449904	0.011832	LSP×W1118_E_2W
2.04177	0.502847	0.140036	LSP×W1118_E_2W
2.02588	0.500029	0.101612	LSP×W1118_E_2W
2.03751	0.491294	0.033038	LSP×W1118_E_2W
2.16615	0.465222	0.081704	LSP×W1118_E_2W
2.18278	0.462968	0.089553	LSP×W1118_E_2W
2.23951	0.456091	0.130983	LSP×W1118_E_2W
2.19061	0.463839	0.107657	LSP×W1118_E_2W
2.12342	0.471202	0.023482	LSP×W1118_E_2W
2.25303	0.444445	0.035976	LSP×W1118_E_2W
1.73294	0.577365	0.023233	LSP×W1118_E_2W
1.73308	0.582334	0.084025	LSP×W1118_E_2W
1.77442	0.568258	0.083492	LSP×W1118_E_2W
2.14304	0.46993	0.07559	LSP×W1118_E_2W
2.18588	0.461085	0.078974	LSP×W1118_E_2W
1.81607	0.550739	0.013923	LSP×W1118_E_5W
1.84623	0.541727	0.013563	LSP×W1118_E_5W
1.94694	0.516308	0.066816	LSP×W1118_E_5W
1.38286	0.723317	0.015906	LSP×W1118_E_5W
1.36401	0.733352	0.018413	LSP×W1118_E_5W
1.72033	0.583461	0.056544	LSP×W1118_E_5W
1.53198	0.653099	0.023844	LSP×W1118_E_5W
1.52402	0.656462	0.021182	LSP×W1118_E_5W
1.95399	0.512372	0.033246	LSP×W1118_E_5W
1.55703	0.643773	0.046733	LSP×W1118_E_5W
1.89039	0.529108	0.014879	LSP×W1118_E_5W
1.51504	0.66101	0.037444	LSP×W1118_E_5W
1.49877	0.667751	0.029157	LSP×W1118_E_5W
1.3804	0.734246	0.109434	LSP×W1118_E_5W
1.7539	0.570577	0.027356	LSP×W1118_E_5W
1.9007	0.556706	0.175618	LSP×W1118_E_5W
1.81374	0.551948	0.032649	LSP×W1118_E_5W
1.90732	0.524527	0.022266	LSP×W1118_E_5W
1.19101	0.84316	0.070924	LSP×W1118_E_5W
1.27436	0.817467	0.1566	LSP×W1118_E_5W
1.57359	0.64222	0.096321	LSP×W1118_E_5W
1.56213	0.641341	0.039994	LSP×W1118_E_5W
1.59776	0.626998	0.042845	LSP×W1118_E_5W
1.62443	0.632804	0.118165	LSP×W1118_E_5W
1.51462	0.660463	0.019457	LSP×W1118_E_5W
1.67666	0.596833	0.02723	LSP×W1118_E_5W
1.65419	0.605928	0.048007	LSP×W1118_E_5W
1.77231	0.565325	0.042253	LSP×W1118_E_5W
1.54684	0.647776	0.044661	LSP×W1118_E_5W
1.54273	0.649348	0.041922	LSP×W1118_E_5W
2.51127	0.401601	0.092707	W1118_A_2W
1.87696	0.570599	0.0690414	W1118_A_2W
1.88159	0.558746	0.233697	W1118_A_2W
1.76245	0.578615	0.132786	W1118_A_2W
2.18322	0.476273	0.191731	W1118_A_2W
2.80918	0.360167	0.129927	W1118_A_2W
2.71494	0.373435	0.119517	W1118_A_2W
1.76995	0.566108	0.044324	W1118_A_2W
1.66467	0.601255	0.029499	W1118_A_2W
2.61137	0.38366	0.041934	W1118_A_2W
2.419	0.414534	0.0471	W1118_A_2W
1.90982	0.524957	0.052492	W1118_A_2W
1.65003	0.607949	0.052934	W1118_A_2W
3.28205	0.305216	0.041732	W1118_A_2W
1.9327	0.519662	0.05619	W1118_A_2W
1.66811	0.600271	0.036554	W1118_A_2W
1.93501	0.523813	0.137118	W1118_A_2W
2.56202	0.40655	0.181127	W1118_A_2W
1.6405	0.611272	0.0576795	W1118_A_2W
2.00635	0.498809	0.028317	W1118_A_2W
1.85361	0.550932	0.143405	W1118_A_2W
2.87186	0.348963	0.044585	W1118_A_2W
2.13702	0.468279	0.02799	W1118_A_2W
2.18048	0.460086	0.056119	W1118_A_2W
1.6932	0.592428	0.054322	W1118_A_2W
2.50061	0.401058	0.053635	W1118_A_2W
2.64819	0.378433	0.047393	W1118_A_2W
2.19011	0.456833	0.02261	W1118_A_2W
2.15964	0.463956	0.043814	W1118_A_2W
1.80795	0.555416	0.0659112	W1118_A_2W
2.07905	0.54024	0.34168	W1118_A_5W
1.21475	1.0799	0.746113	W1118_A_5W
1.98622	0.546028	0.35279	W1118_A_5W
1.84398	0.588107	0.349367	W1118_A_5W
1.95797	0.596438	0.537227	W1118_A_5W
0.923077	1.31038	0.43584	W1118_A_5W
1.01374	1.15923	0.460036	W1118_A_5W
1.63749	0.657371	0.299436	W1118_A_5W
1.26492	0.964418	0.487104	W1118_A_5W
1.15473	0.988194	0.381485	W1118_A_5W
2.22892	0.471818	0.28568	W1118_A_5W
0.738922	1.62791	0.690603	W1118_A_5W
1.49899	0.712518	0.389743	W1118_A_5W
0.858113	1.45505	0.308756	W1118_A_5W
1.76158	0.66464	0.404029	W1118_A_5W
1.53369	0.751099	0.511777	W1118_A_5W
1.5697	0.749045	0.527211	W1118_A_5W
1.76614	0.728148	1.06553	W1118_A_5W
1.76644	0.65646	0.384843	W1118_A_5W
1.60479	0.669579	0.284963	W1118_A_5W
1.70258	0.628955	0.269317	W1118_A_5W
1.53642	0.698237	0.228194	W1118_A_5W
1.47411	0.699746	0.205505	W1118_A_5W
1.69077	0.608604	0.197653	W1118_A_5W
1.75288	0.597818	0.195374	W1118_A_5W
1.50626	0.69058	0.191249	W1118_A_5W
2.33747	0.482975	0.759383	W1118_A_5W
2.15965	0.60256	0.565817	W1118_A_5W
2.29788	0.501042	0.405024	W1118_A_5W
1.84155	0.594862	0.292932	W1118_A_5W
1.91157	0.523329	0.020064	W1118_E_2W
1.72787	0.579555	0.035856	W1118_E_2W
1.7626	0.567487	0.016107	W1118_E_2W
2.7573	0.364417	0.067844	W1118_E_2W
2.39919	0.425817	0.137931	W1118_E_2W
1.92551	0.519541	0.019742	W1118_E_2W
1.84409	0.542617	0.025164	W1118_E_2W
1.93418	0.51785	0.037122	W1118_E_2W
1.95877	0.510718	0.019912	W1118_E_2W
1.82328	0.548698	0.021994	W1118_E_2W
1.83297	0.54573	0.017564	W1118_E_2W
2.02378	0.518655	0.16808	W1118_E_2W
1.96977	0.50829	0.035752	W1118_E_2W
1.93855	0.516305	0.030123	W1118_E_2W
2.5061	0.402812	0.092268	W1118_E_2W
1.97852	0.515889	0.13521	W1118_E_2W
1.71067	0.5849	0.023627	W1118_E_2W
1.9183	0.52151	0.020365	W1118_E_2W
2.60803	0.383761	0.029177	W1118_E_2W
2.53921	0.393888	0.013151	W1118_E_2W
2.30655	0.433611	0.012089	W1118_E_2W
2.2959	0.435614	0.013067	W1118_E_2W
2.05243	0.488759	0.053965	W1118_E_2W
1.93211	0.518838	0.046763	W1118_E_2W
1.7691	0.565487	0.020752	W1118_E_2W
2.07783	0.481388	0.015552	W1118_E_2W
2.06193	0.485819	0.041539	W1118_E_2W
2.01618	0.496086	0.014239	W1118_E_2W
2.03361	0.491875	0.018111	W1118_E_2W
1.81557	0.551343	0.031415	W1118_E_2W
1.77231	0.565325	0.042253	W1118_E_5W
1.55971	0.6417	0.029406	W1118_E_5W
1.52985	0.654702	0.042067	W1118_E_5W
1.33342	0.753164	0.062977	W1118_E_5W
1.48416	0.675275	0.05071	W1118_E_5W
1.30132	0.768979	0.026066	W1118_E_5W
1.54684	0.647776	0.044661	W1118_E_5W
1.4815	0.675648	0.031176	W1118_E_5W
1.45363	0.688322	0.023723	W1118_E_5W
1.79335	0.557997	0.026318	W1118_E_5W
1.8775	0.557241	0.112834	W1118_E_5W
1.27166	0.796783	0.108996	W1118_E_5W
1.27086	0.788029	0.0384	W1118_E_5W
1.83969	0.543805	0.020985	W1118_E_5W
1.82929	0.54707	0.027877	W1118_E_5W
1.30957	0.7639	0.019914	W1118_E_5W
1.8654	0.536395	0.024323	W1118_E_5W
1.82288	0.548851	0.023325	W1118_E_5W
1.50626	0.69058	0.191249	W1118_E_5W
1.64663	0.612342	0.082568	W1118_E_5W
1.84683	0.544538	0.087967	W1118_E_5W
1.73425	0.576893	0.021783	W1118_E_5W
1.8914	0.528963	0.021971	W1118_E_5W
1.75411	0.572807	0.05799	W1118_E_5W
1.54273	0.649348	0.041922	W1118_E_5W
1.00321	1.00873	0.128732	W1118_E_5W
1.667	0.601908	0.058468	W1118_E_5W
1.65419	0.605928	0.048007	W1118_E_5W
1.45756	0.687728	0.049393	W1118_E_5W
1.35711	0.737342	0.025603	W1118_E_5W

## Sheet: Sheet2
1.84004	0.55466	0.145191
2.00151	0.500295	0.037533
1.88939	0.530389	0.0433199
1.79919	0.556326	0.0313259
1.67666	0.596833	0.0272297
1.65419	0.605928	0.0480074
1.77231	0.565325	0.0422529
1.54684	0.647776	0.0446608
1.54273	0.649348	0.0419218
1.83028	0.546913	0.0325787
1.50626	0.69058	0.191249
1.86586	0.537407	0.0485633
1.53642	0.698237	0.228194
1.59686	0.62666	0.0263819
1.94436	0.515317	0.044919
2.15965	0.60256	0.565817
3.00946	0.347639	0.297751
2.90563	0.344901	0.0498688
2.46478	0.428656	0.269295
2.29788	0.501042	0.405024
3.29247	0.304059	0.0332034
2.26103	0.455838	0.212325
2.03621	0.49142	0.0259952
2.22149	0.45029	0.0179851
2.01142	0.514473	0.173648
2.82483	0.389651	0.303613
2.70465	0.390599	0.207169
2.52217	0.400506	0.1311
3.15814	0.332105	0.320897
2.23097	0.452756	0.107693
2.97176	0.363026	0.40387
2.5885	0.409072	0.2376
2.82541	0.363291	0.18776
2.81638	0.35531	0.0296373
2.61243	0.382924	0.0194299
2.7251	0.386776	0.237949
2.38702	0.420817	0.0683128
2.05627	0.496493	0.144521
1.47411	0.699746	0.205505
1.74939	0.583935	0.147805
1.76614	0.728148	1.06553
1.45248	0.689252	0.0332713
1.90121	0.537116	0.128783
2.19908	0.476345	0.204421
2.00502	0.499072	0.026057
1.54468	0.651542	0.0733581
1.76644	0.65646	0.384843
1.55866	0.642903	0.0447293
1.7035	0.592913	0.0885508
1.84333	0.542802	0.0240355
1.39179	0.72072	0.058188
1.48346	0.676864	0.0643169
1.37678	0.742681	0.130778
1.83245	0.54588	0.0172141
1.62411	0.616453	0.0330035
1.69802	0.590345	0.0471657
1.67395	0.606321	0.123627
1.71508	0.596344	0.156856
2.05702	0.494363	0.139332
1.84211	0.546806	0.0837119
2.56277	0.4309	0.377217
2.22199	0.450394	0.0278928
2.15107	0.46547	0.0350867
1.98622	0.546028	0.35279
1.84398	0.588107	0.349367
1.93289	0.550925	0.229477
2.13066	0.474151	0.100791
2.33747	0.482975	0.759383
1.8837	0.552096	0.218045
1.60479	0.669579	0.284963
2.47227	0.412859	0.144476
1.95797	0.596438	0.537227
1.83405	0.551772	0.109832
1.3854	0.725409	0.072723
2.23792	0.447722	0.0440155
1.39425	0.718298	0.039275
2.64407	0.394634	0.191213
1.67956	0.60977	0.152052
1.64663	0.612342	0.0825685
2.12095	0.474666	0.0735041
1.88661	0.532456	0.066299
2.27529	0.439722	0.0223271
1.53016	0.656462	0.0653895
1.667	0.601908	0.0584681
1.61374	0.628715	0.107058
1.69077	0.608604	0.197653
2.08265	0.481661	0.055814
1.81038	0.565026	0.181289
1.98356	0.50975	0.098634
1.72851	0.579874	0.0484126
1.78397	0.563319	0.0704538
2.29867	0.447229	0.17225
2.22892	0.471818	0.28568
2.17452	0.46346	0.09865
1.88044	0.536094	0.0872162
1.77641	0.569968	0.10344
2.01797	0.495674	0.0161216
1.95143	0.512649	0.0199047
2.10046	0.480867	0.0879841
2.08928	0.482031	0.0789795
2.27295	0.440317	0.0282747
2.25861	0.443069	0.0271118
2.12843	0.477716	0.130397
2.04881	0.503524	0.175395
1.84155	0.594862	0.292932
1.70258	0.628955	0.269317
2.23093	0.449412	0.052042
1.68968	0.592261	0.0269603
1.47841	0.678057	0.0490989
2.05782	0.486475	0.0330474
1.98998	0.503278	0.0417189
1.45631	0.687525	0.0353832
1.18189	0.848833	0.0587943
1.76835	0.568865	0.0770594
1.76745	0.569174	0.072505
1.83811	0.544531	0.0298836
1.82099	0.549665	0.0305811
1.89235	0.531281	0.0708424
1.77444	0.565477	0.0588225
1.5859	0.631918	0.0466604
1.59776	0.626998	0.0428448
1.59593	0.626829	0.0196159
1.63227	0.612935	0.0225746
1.69162	0.591784	0.0329849
1.8401	0.544386	0.0414986
1.52829	0.656458	0.0590162
1.87696	0.570599	0.0690414
2.05302	0.487306	0.0213987
1.72397	0.58057	0.0305514
1.75154	0.573585	0.0662942
2.1021	0.475957	0.0235702
2.05394	0.487043	0.0190056
2.14831	0.468199	0.0753734
2.09327	0.477975	0.0257435
1.86876	0.535509	0.0269998
1.45	0.691724	0.0525856
0.98445	1.01839	0.0501153
1.6617	0.602066	0.0213787
0.964002	1.03816	0.0281577
2.33592	0.431721	0.105643
1.3851	0.723453	0.0460049
1.94233	0.515598	0.0390814
1.47401	0.678994	0.0289375
1.07872	0.943124	0.126898
1.78831	0.561478	0.0647499
1.6405	0.611272	0.0576795
1.05645	0.951909	0.0863622
1.25848	0.832364	0.189648
1.42844	0.71642	0.145568
1.47371	0.679929	0.0464928
1.53968	0.649711	0.0186736
1.27718	0.78458	0.0464589
1.34408	0.758218	0.135478
1.04375	0.96225	0.0652028
1.43704	0.696684	0.034979
1.42582	0.707228	0.113404
1.47728	0.679552	0.0610229
1.35241	0.745344	0.0907199
2.18571	0.471816	0.153588
2.50039	0.40083	0.045619
2.44453	0.412076	0.094024
2.29974	0.438282	0.0984503
2.26977	0.440915	0.0278277
1.46248	0.705859	0.157952
1.01338	0.987167	0.0195031
1.10972	0.902135	0.0342125
2.03511	0.491557	0.0218215
2.27219	0.440555	0.0322793
1.89045	0.530269	0.0505814
1.75288	0.597818	0.195374
1.94051	0.5198	0.122803
1.33541	0.750413	0.0456588
0.962267	1.07641	0.183471
2.24073	0.450288	0.121787
2.25707	0.451029	0.124616
2.21981	0.462837	0.178318
1.30957	0.7639	0.0199138
1.46767	0.684206	0.0566597
1.10658	0.905129	0.0412128
1.02122	0.990316	0.104556
1.32532	0.755206	0.0297639
1.68357	0.604354	0.123594
1.34391	0.744517	0.0238585
1.54425	0.650947	0.0679268
0.905209	1.10722	0.0481069
1.09194	0.917524	0.0433421
0.967384	1.04016	0.0836455
0.983491	1.02013	0.05771
0.969486	1.03472	0.0566849
1.24637	0.810351	0.101589
1.25857	0.795436	0.0338803
1.2392	0.807903	0.0338486
1.35921	0.737949	0.0570702
1.1394	0.899868	0.129378
0.950557	1.05881	0.0829765
0.969145	1.03416	0.0519778
0.942188	1.06364	0.0464414
1.05042	0.954262	0.0495744
1.04248	0.961224	0.0452989
0.970502	1.0333	0.0534622
1.00369	0.998775	0.0500507
1.05491	0.949454	0.0407588
1.04559	0.961195	0.070319
1.40326	0.714066	0.04562
1.32425	0.762636	0.0923051
1.49807	0.668294	0.0343839
