# Supplementary material for: Early Life Exercise Training and Inhibition of Apolipoprotein B Expression to Improve Age-Related Arrhythmias and Prolong the Average Lifespan in Drosophila
Source: Preprints.org preprint supplement (doi:10.20944/preprints202203.0380.v1), 2022-03-29
Supplement: Supplementary file 2 [file Raw data.xlsx]

## Sheet: TG
						Figure 2B
						2 Week			5 Week
					W1118	41.8458	44.3426	43.8369	94.469	95.2276	90.4867
					LSP2-Gal4	44.5006	47.5348	45.9229	97.598	96.5866	101.738
					LSP2-Gal4>W1118	40.4551	40.5183	42.225	103.319	101.991	107.269
						Figure 3B
						LSP2-Gal4>W1118			LSP2-Gal4>apoLppRNAi
					2 Week	40.4551	40.5183	42.225	46.1441	46.2705	46.9027
					5 Week	103.319	101.991	107.269	81.1947	75.0632	83.4387
						Figure 6A
						Control			ELET
					2 Week	41.8458	44.3426	43.8369	44.7219	46.4286	41.3717
					5 Week	94.469	95.2276	90.4867	48.6094	45.6384	46.555
						Figure 6D
						Control			ELET
					2 Week	44.5006	47.5348	45.9229	40.0126	36.4412	37.6738
					5 Week	97.598	96.5866	101.738	74.4311	79.4248	68.9633
						Figure 6G
						Control			ELET
					2 Week	40.4551	40.5183	42.225	41.6877	42.6991	38.8432
					5 Week	103.319	101.991	107.269	67.1934	63.9064	64.0329

## Sheet: PCR
						Figure 2D
						2 Week			5 Week
					W1118	0.884745	1.00231	1.12766	1.79419	1.65099	1.93634
					LSP2-Gal4	1.00231	0.99539	1.00231	2.07053	1.59107	1.81504
					LSP2-Gal4>W1118	0.963707	0.793701	1.16205	4.83439	5.00487	4.63746
						Figure 3D
						2 Week			5 Week
					LSP2-Gal4>W1118	0.920188	1.04247	1.17283	4.83439	5.00487	4.63746
					LSP2-Gal4>apoLppRNAi	0.591862	0.612734	0.567752	1.02101	1.27456	0.858565
						Figure 6C
						Control			ELET
					2 Week	1.00231	0.825496	1.2086	0.41658	0.471937	0.686184
					5 Week	1.86607	1.71713	2.01391	0.895025	1.04247	0.835088
						Figure 6F
						Control			ELET
					2 Week	1.00231	0.99539	1.00231	0.646176	0.673617	0.655197
					5 Week	2.07053	1.59107	1.81504	1.03049	1.00231	1.05214
						Figure 6I
						Control			ELET
					2 Week	1.00231	0.99539	1.00231	0.68302	0.790041	0.737135
					5 Week	4.83439	5.00487	4.63746	0.935191	1.08172	0.890899

## Sheet: Climbing Index
								Figure 2A
								2 Week			5 Week
							W1118	0.62	0.54	0.56	0.08	0.08	0.1
							LSP2-Gal4	0.6	0.58	0.54	0.12	0.04	0.12
							LSP2-Gal4>W1118	0.54	0.62	0.5	0.1	0.06	0.1
								Figure 3A
								LSP2-Gal4>W1118			LSP2-Gal4>apoLppRNAi
							2 Week	0.54	0.62	0.5	0.94	0.88	0.9
							5 Week	0.1	0.06	0.1	0.62	0.5	0.448276

## Sheet: Weight
								Figure 2C
								2 Week			5 Week
							W1118	0.00474	0.00485	0.00446	0.00625	0.00647	0.00638
							LSP2-Gal4	0.00379	0.00352	0.00425	0.00584	0.0057	0.00563
							LSP2-Gal4>W1118	0.00414	0.00461	0.00479	0.00623	0.00657	0.00593
								Figure 3C
								LSP2-Gal4>W1118			LSP2-Gal4>apoLppRNAi
							2 Week	0.00414	0.00461	0.00479	0.00366	0.0046	0.00452
							5 Week	0.00623	0.00657	0.00593	0.00488	0.00545	0.0054
								Figure 6B
								Control			ELET
							2 Week	0.00474	0.00485	0.00446	0.00444	0.00464	0.00378
							5 Week	0.00625	0.00647	0.00638	0.00637	0.00577	0.00621
								Figure 6E
								Control			ELET
							2 Week	0.00379	0.00352	0.00425	0.004	0.00407	0.00393
							5 Week	0.00584	0.0057	0.00563	0.0061	0.00541	0.00574
								Figure 6H
								Control			ELET
							2 Week	0.00414	0.00461	0.00479	0.00573	0.00592	0.00465
							5 Week	0.00623	0.00657	0.00593	0.00574	0.00594	0.00571

## Sheet: Survive
							Group
					Age		W1118	W1118+Exercise	LSP2-Gal4	LSP2-Gal4+Exercise	LSP2-Gal4>W1118	LSP2-Gal4>W1118+Exercise	LSP2-Gal4>apoLppRNAi	LSP2-Gal4>apoLppRNAi+Exercise
					DAY1		0	0	0	0	0	0	0	0
					DAY3		0	0	0	0	0	0	0	0
					DAY5		6	0	0	0	0	0	0	0
					DAY7		0	0	0	0	0	0	0	2
					DAY9		0	0	2	0	1	1	2	2
					DAY11		0	1	2	6	0	0	3	1
					DAY13		2	0	3	5	0	0	0	0
					DAY15		1	0	2	6	0	3	3	0
					DAY17		2	0	3	3	0	2	4	2
					DAY19		2	1	2	1	6	0	3	4
					DAY21		1	1	1	2	2	1	7	0
					DAY23		0	1	2	2	1	3	8	2
					DAY25		0	0	8	3	3	1	7	2
					DAY27		0	0	3	0	2	5	0	4
					DAY29		0	0	5	4	1	0	1	0
					DAY31		3	3	15	5	1	2	2	2
					DAY33		4	0	10	6	0	0	0	1
					DAY35		2	2	5	8	0	2	0	3
					DAY37		1	2	5	8	1	2	0	3
					DAY39		2	1	2	2	1	1	0	2
					DAY41		0	0	7	3	0	4	1	1
					DAY43		1	1	2	6	0	0	2	0
					DAY45		2	0	3	9	0	1	0	0
					DAY47		1	0	1	5	1	1	1	0
					DAY49		0	0	2	1	1	0	0	0
					DAY51		0	3	4	5	6	9	1	4
					DAY53		0	0	6	1	5	0	0	3
					DAY55		2	2	2	6	1	3	3	0
					DAY57		0	3	24	4	0	3	0	3
					DAY59		1	3	18	10	0	0	0	2
					DAY61		2	4	5	9	9	5	6	1
					DAY63		6	5	6	23	4	1	0	2
					DAY65		7	9	0	21	1	0	0	3
					DAY67		4	8	4	4	1	1	1	1
					DAY69		4	2	7	5	4	2	4	2
					DAY71		3	4	2	1	1	5	4	2
					DAY73		3	3	4	5	1	5	2	4
					DAY75		3	5	3	1	1	1	2	1
					DAY77		2	3	3	2	5	7	2	2
					DAY79		4	5	3	1	13	1	2	2
					DAY81		4	3	5	5	3	4	3	1
					DAY83		5	5	2	3	9	3	9	0
					DAY85		6	3	2	0	7	2	3	6
					DAY87		2	7	2	1	5	2	6	6
					DAY89		5	6	2	0	12	0	6	2
					DAY91		10	13	1	1	2	11	7	4
					DAY93		7	7			2	7	6	4
					DAY95		12	28			22	6	17	1
					DAY97		20	28			16	12	16	7
					DAY99		19	6			12	8	5	9
					DAY101		10	14			10	20	11	5
					DAY103		9	11			10	7	10	13
					DAY105		10	7			7	11	13	5
					DAY107		10				14	14	12	21
					DAY109		2				1	2		18
					DAY111									11
					DAY113									5
					DAY115									2
					DAY117
					DAY119
					DAY121
					DAY123
					DAY125
					DAY127
					DAY129		Total
					DAY131		202	210	190	193	205	181	195	183
